# Supplementary material
Source: PubMed Central journal article supplement (PMC3022940)

Figures 1.1-1.10 show the polynomial curve fits to the mean all-night sleep stage variables (for sleep episodes on which either no beverage or placebo beverage was administered). The  $R^2$  values for these fits are also presented for each variable.

Figure 1.1

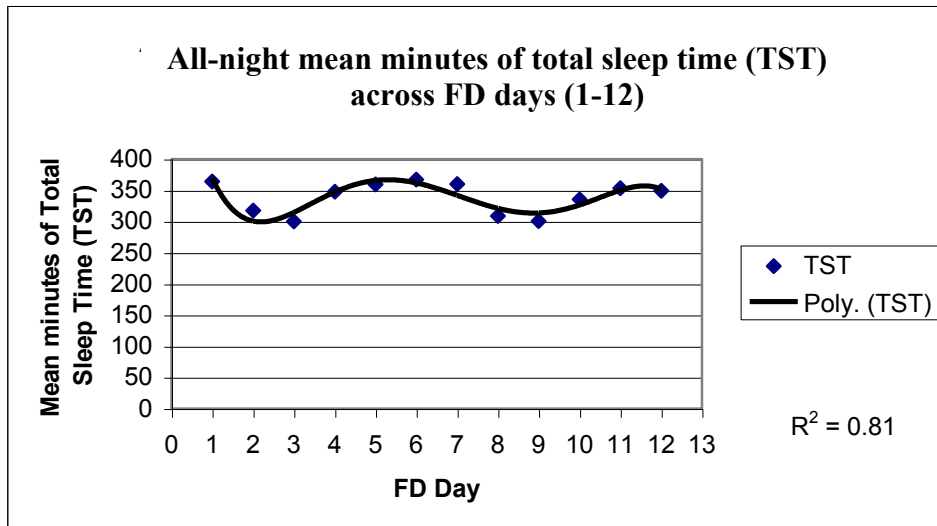

Figure 1.2

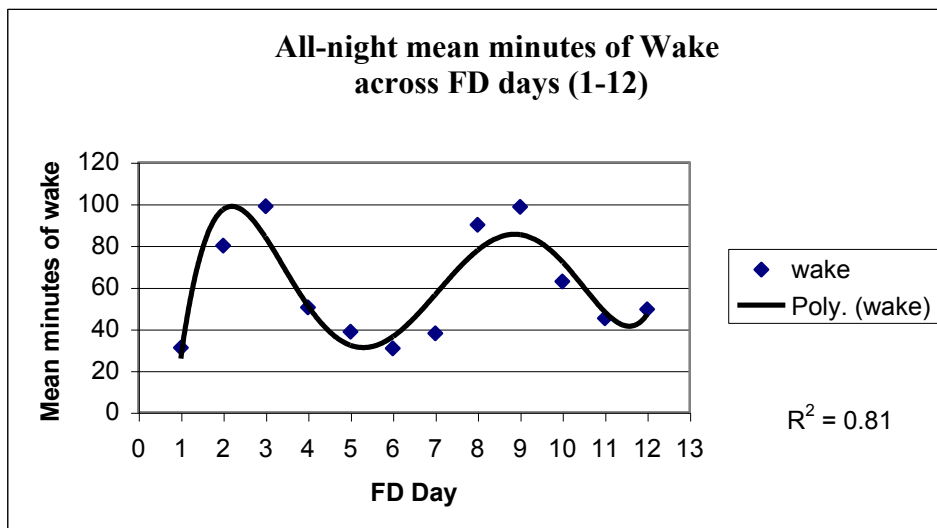

Figure 1.3

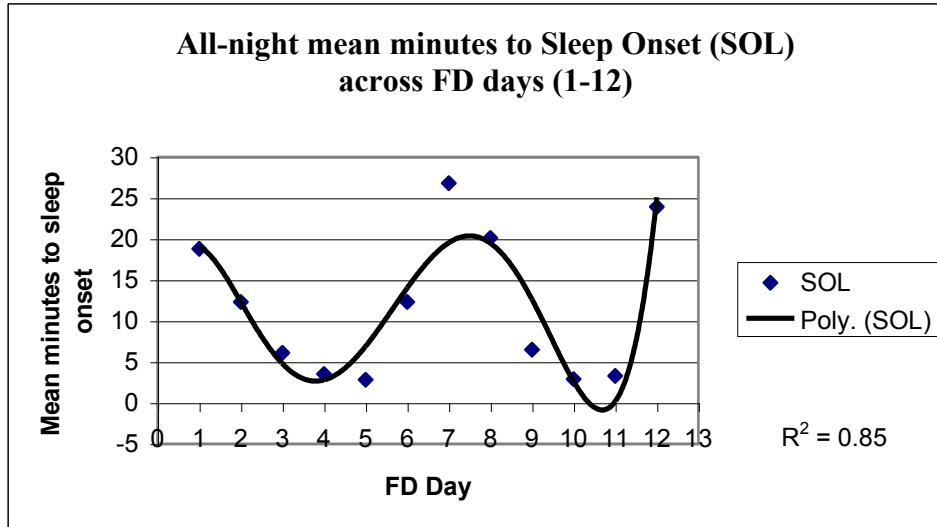

Figure 1.4

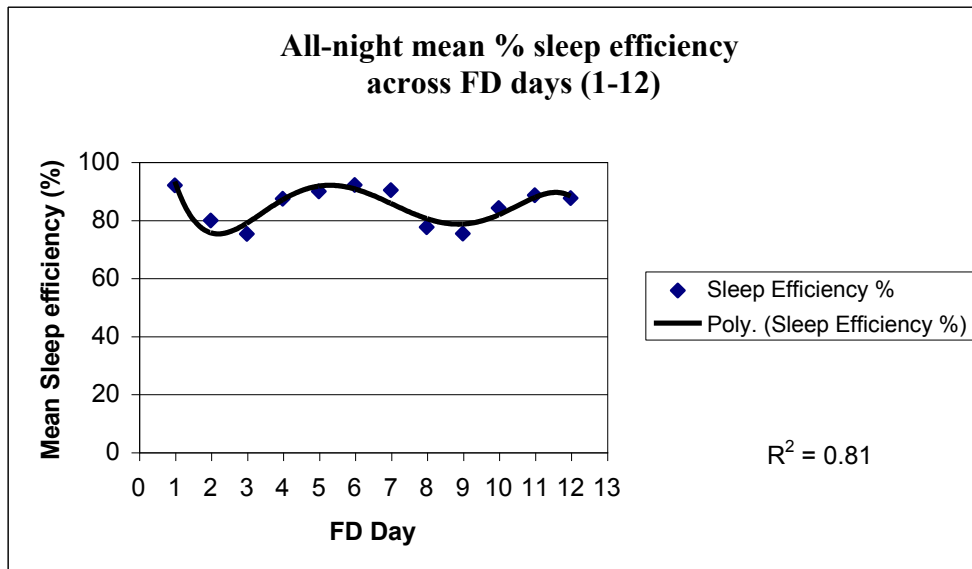

Figure 1.5

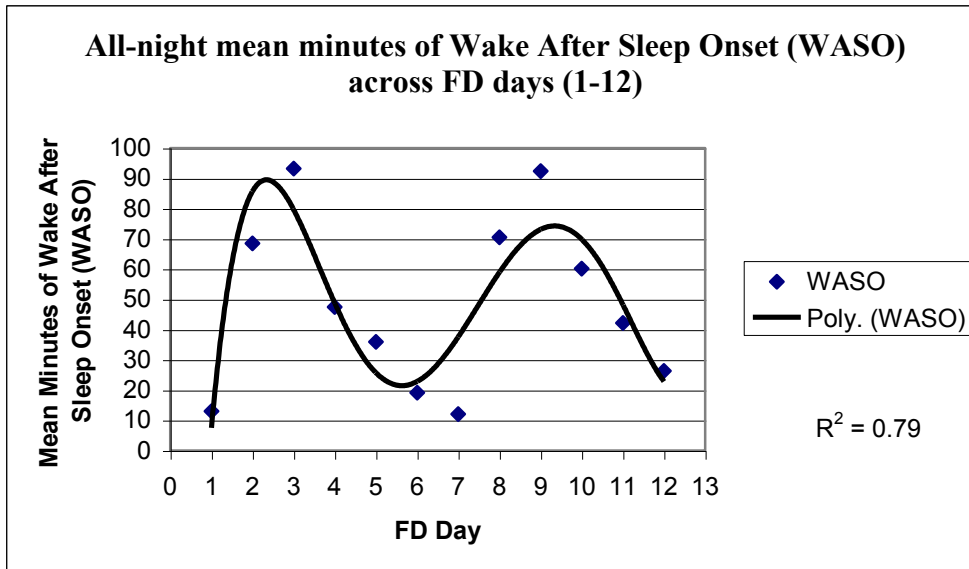

Figure 1.6

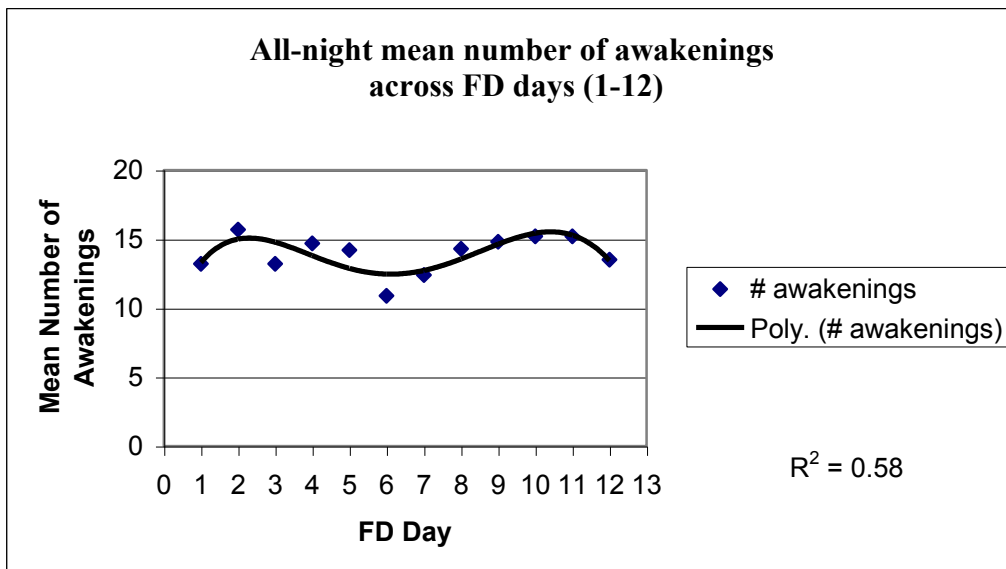

Figure 1.7

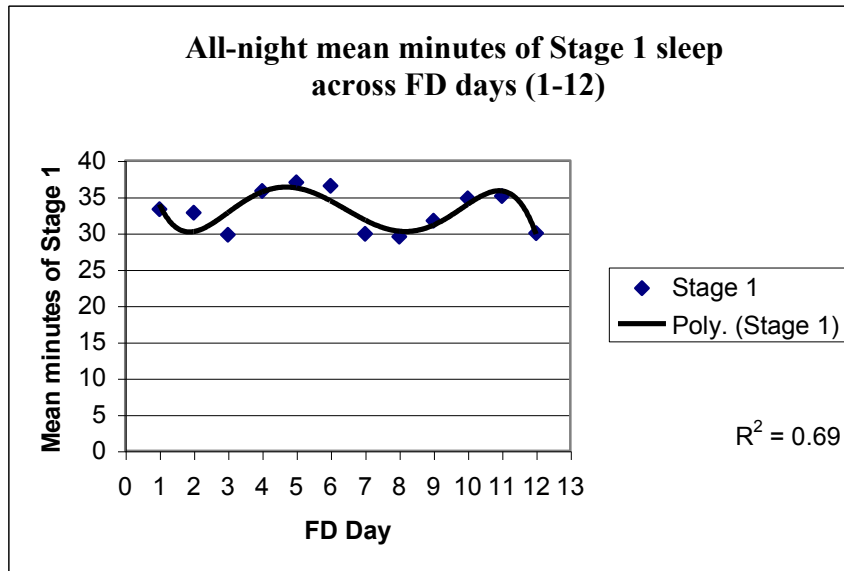

Figure 1.8

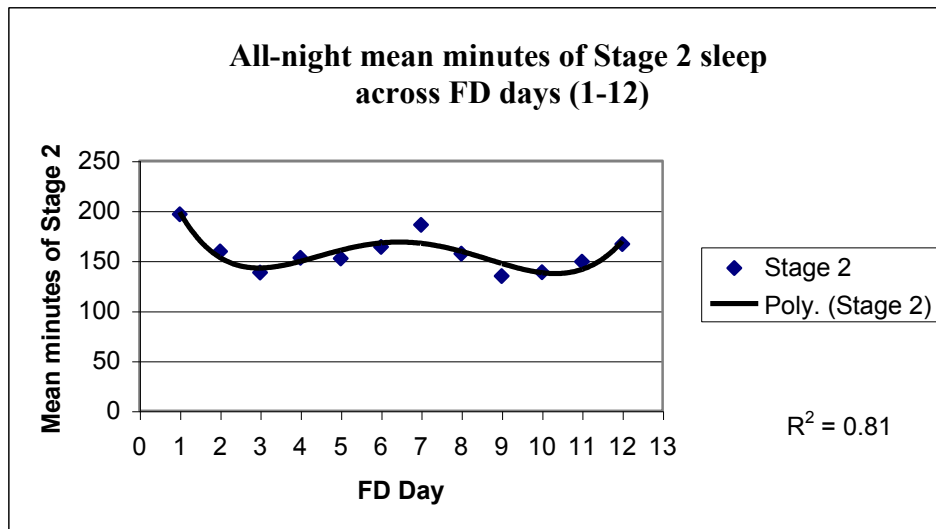

Figure 1.9

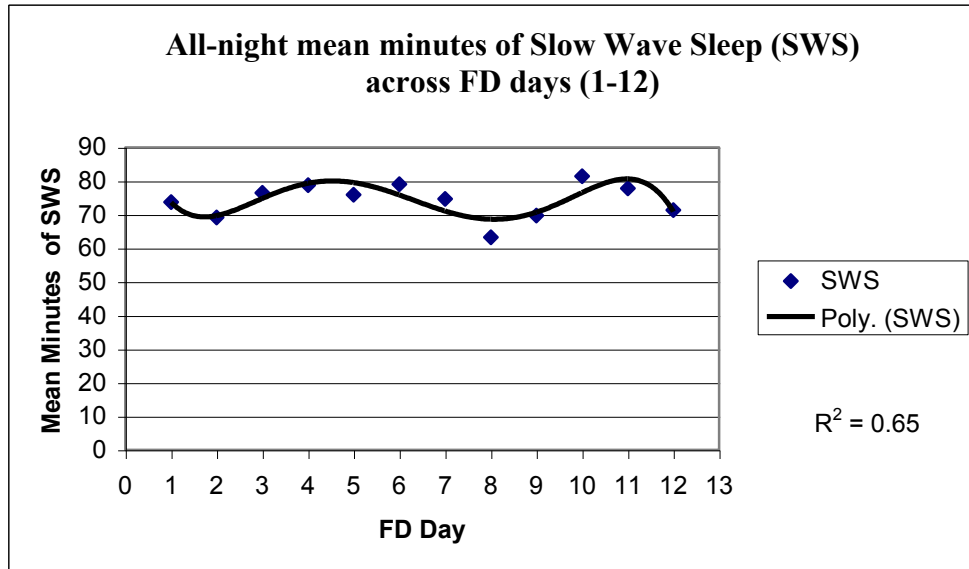

Figure 1.10

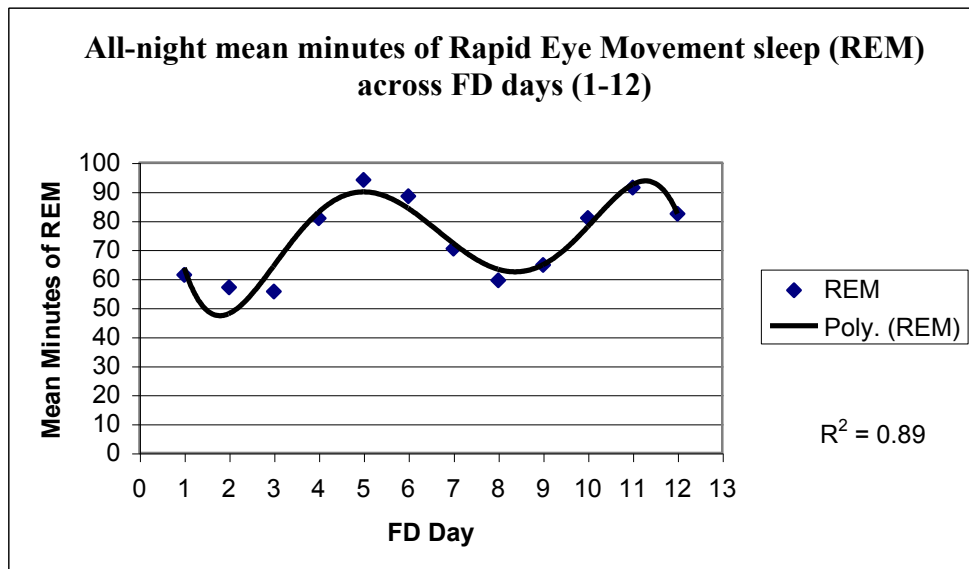

Supplement: aasm.34.2.195s1.pdf [file aasm.34.2.195s1.pdf]
