# Supplementary material
Source: PubMed Central journal article supplement (PMC3022940)
Supplement: aasm.34.2.195s2.pdf [file aasm.34.2.195s2.pdf]

Descriptive statistics for all-night sleep stage variables (for sleep episodes on which either no beverage or placebo beverage was administered) computed separately for each FD day (1-12). A list of the variables presented in Tables 1.1-1.12 and the translation to the variables analyzed in this paper are presented below.

| Variables Listed in Tables | Variable Name Used in Text       |
|----------------------------|----------------------------------|
| SleepEfficiency            | Sleep Efficiency                 |
| S.O.mins                   | Sleep Onset Latency (SOL)        |
| TotalSleepTimeTSTmins      | Total Sleep Time (TST)           |
| stage1mins                 | Minutes of Stage 1 Sleep         |
| Stage2min                  | Minutes of Stage 2 Sleep         |
| Stage3mins                 | Minutes of Stage 3 Sleep         |
| Stage4mins                 | Minutes of Stage 4 Sleep         |
| REMmins                    | Minutes of REM Sleep             |
| Wakemins                   | Minutes of Wake                  |
| Numawak                    | Number of Awakenings             |
| WASO                       | Wake After Sleep Onset (WASO)    |
| SWS                        | Minutes of Slow Wave Sleep (SWS) |

**Table 1.1. Descriptive Statistics for FD1**

**Descriptive Statistics**

|                          | N  | Minimum | Maximum | Mean     | Std. Deviation |
|--------------------------|----|---------|---------|----------|----------------|
| SleepEfficiencyFD1       | 19 | 82.06   | 97.63   | 91.8821  | 3.51409        |
| S.O.minsFD1              | 19 | 5.00    | 35.00   | 18.7632  | 8.51856        |
| TotalSleepTimeTSTminsFD1 | 19 | 327.00  | 390.50  | 364.1579 | 15.72247       |
| stage1minsFD1            | 19 | 10.50   | 59.00   | 33.2632  | 13.59061       |
| Stage2minsFD1            | 19 | 148.50  | 240.50  | 196.5526 | 26.72228       |
| Stage3minsFD1            | 19 | 12.00   | 41.50   | 25.1316  | 9.29582        |
| Stage4minsFD1            | 19 | 22.50   | 76.00   | 48.5526  | 15.57143       |
| REMminsFD1               | 19 | 43.50   | 89.00   | 61.3421  | 14.08708       |
| WakeminsFD1              | 19 | 9.00    | 71.50   | 31.0526  | 14.51904       |
| numawakFD1               | 19 | 2.00    | 25.00   | 13.2105  | 6.23234        |
| WASOFD1                  | 19 | 1.00    | 39.50   | 13.0263  | 10.44759       |
| SWSFD1                   | 19 | 51.00   | 107.00  | 73.6842  | 15.17967       |
| Valid N (listwise)       | 19 |         |         |          |                |

**Table 1.2. Descriptive Statistics for FD2**

## Descriptive Statistics

|                          | N  | Minimum | Maximum | Mean     | Std. Deviation |
|--------------------------|----|---------|---------|----------|----------------|
| SleepEfficiencyFD2       | 21 | 32.25   | 99.13   | 79.6519  | 20.32543       |
| S.O.minsFD2              | 21 | 1.50    | 37.50   | 12.2857  | 8.91007        |
| TotalSleepTimeTSTminsFD2 | 21 | 129.00  | 396.50  | 317.7143 | 81.18491       |
| stage1minsFD2            | 21 | 6.50    | 59.50   | 32.8095  | 14.77200       |
| Stage2minsFD2            | 21 | 45.50   | 239.50  | 159.3095 | 50.94224       |
| Stage3minsFD2            | 21 | 4.00    | 43.00   | 22.2857  | 11.25008       |
| Stage4minsFD2            | 21 | 24.50   | 77.50   | 46.9048  | 15.34733       |
| REMminsFD2               | 21 | 19.00   | 96.00   | 57.0952  | 24.37397       |
| WakeminsFD2              | 21 | 3.50    | 264.50  | 80.1429  | 80.12539       |
| numawakFD2               | 21 | 1.00    | 40.00   | 15.7143  | 8.49201        |
| WASOFD2                  | 21 | 1.00    | 257.50  | 68.5476  | 81.95683       |
| SWSFD2                   | 21 | 33.50   | 101.00  | 69.1905  | 19.25713       |
| Valid N (listwise)       | 21 |         |         |          |                |

**Table 1.3. Descriptive Statistics for FD3**

## Descriptive Statistics

|                          | N  | Minimum | Maximum | Mean     | Std. Deviation |
|--------------------------|----|---------|---------|----------|----------------|
| SPDurationMinutesFD3     | 21 | 399.00  | 401.00  | 399.9762 | .48673         |
| SleepEfficiencyFD3       | 21 | 48.75   | 97.75   | 75.0671  | 13.67051       |
| S.O.minsFD3              | 21 | .50     | 13.00   | 6.0952   | 4.29424        |
| TotalSleepTimeTSTminsFD3 | 21 | 194.50  | 391.00  | 299.8571 | 54.68641       |
| stage1minsFD3            | 21 | 10.00   | 62.50   | 29.8095  | 14.21749       |
| Stage2minsFD3            | 21 | 73.50   | 217.00  | 138.3571 | 35.26299       |
| Stage3minsFD3            | 21 | 6.50    | 31.00   | 19.8571  | 7.38265        |
| Stage4minsFD3            | 21 | 29.50   | 93.50   | 56.5952  | 16.94301       |
| REMminsFD3               | 21 | 23.00   | 110.00  | 55.6190  | 23.18561       |
| WakeminsFD3              | 21 | 3.50    | 204.00  | 98.9048  | 55.11502       |
| numawakFD3               | 21 | 4.00    | 27.00   | 13.2381  | 6.04901        |
| WASOFD3                  | 21 | 2.50    | 194.50  | 93.1905  | 54.78309       |
| SWSFD3                   | 21 | 51.00   | 121.00  | 76.4524  | 17.35216       |
| Valid N (listwise)       | 21 |         |         |          |                |

**Table 1.4. Descriptive Statistics for FD4**

## Descriptive Statistics

|                          | N  | Minimum | Maximum | Mean     | Std. Deviation |
|--------------------------|----|---------|---------|----------|----------------|
| SleepEfficiencyFD4       | 20 | 65.50   | 98.50   | 87.1860  | 9.54523        |
| S.O.minsFD4              | 20 | .50     | 7.50    | 3.4750   | 2.41419        |
| TotalSleepTimeTSTminsFD4 | 20 | 257.00  | 393.50  | 347.9250 | 38.49480       |
| stage1minsFD4            | 20 | 17.50   | 73.00   | 35.8250  | 14.62179       |
| Stage2minsFD4            | 20 | 93.00   | 217.00  | 153.1250 | 36.60273       |
| Stage3minsFD4            | 20 | 8.00    | 42.00   | 20.3250  | 8.97551        |
| Stage4minsFD4            | 20 | 27.50   | 81.50   | 58.4500  | 13.89898       |
| REMminsFD4               | 20 | 61.00   | 117.50  | 80.8000  | 16.96777       |
| WakeminsFD4              | 20 | 6.00    | 137.50  | 50.4000  | 38.07769       |
| numawakFD4               | 20 | 6.00    | 27.00   | 14.7000  | 6.24163        |
| WASOFD4                  | 20 | 4.00    | 134.00  | 47.5250  | 37.79393       |
| SWSFD4                   | 20 | 54.00   | 99.00   | 78.7750  | 13.67525       |
| Valid N (listwise)       | 20 |         |         |          |                |

**Table 1.5. Descriptive Statistics for FD5**

## Descriptive Statistics

|                          | N  | Minimum | Maximum | Mean     | Std. Deviation |
|--------------------------|----|---------|---------|----------|----------------|
| SleepEfficiencyFD5       | 19 | 75.88   | 97.50   | 89.8084  | 6.40642        |
| S.O.minsFD5              | 19 | .00     | 10.50   | 2.8421   | 2.61434        |
| TotalSleepTimeTSTminsFD5 | 19 | 303.50  | 390.50  | 359.4211 | 25.82541       |
| stage1minsFD5            | 19 | 14.50   | 72.50   | 37.0000  | 13.06713       |
| Stage2minsFD5            | 19 | 97.00   | 198.00  | 152.4211 | 29.30504       |
| Stage3minsFD5            | 19 | 13.50   | 41.50   | 24.4737  | 8.19802        |
| Stage4minsFD5            | 19 | 14.50   | 90.50   | 51.4737  | 20.84565       |
| REMinbedFD5              | 19 | 12.63   | 31.00   | 23.5105  | 5.48320        |
| WakeminsFD5              | 19 | 8.00    | 96.50   | 38.6579  | 26.90005       |
| numawakFD5               | 19 | 5.00    | 38.00   | 14.2105  | 8.39033        |
| WASOFD5                  | 19 | 3.00    | 94.50   | 35.8684  | 26.65252       |
| SWSFD5                   | 19 | 37.00   | 113.00  | 75.9474  | 17.98448       |
| Valid N (listwise)       | 19 |         |         |          |                |

**Table 1.6. Descriptive Statistics for FD6**

## Descriptive Statistics

|                          | N  | Minimum | Maximum | Mean     | Std. Deviation |
|--------------------------|----|---------|---------|----------|----------------|
| SleepEfficiencyFD6       | 19 | 73.10   | 98.75   | 91.9763  | 7.98593        |
| S.O.minsFD6              | 19 | 1.50    | 53.00   | 12.3421  | 14.35856       |
| TotalSleepTimeTSTminsFD6 | 19 | 293.00  | 395.50  | 367.4211 | 31.77580       |
| stage1minsFD6            | 19 | 15.00   | 101.50  | 36.4737  | 18.91463       |
| Stage2minsFD6            | 19 | 114.00  | 218.50  | 164.0263 | 28.42899       |
| Stage3minsFD6            | 19 | 12.00   | 57.00   | 23.8947  | 10.05896       |
| Stage4minsFD6            | 19 | 18.50   | 100.50  | 55.1579  | 21.85435       |
| REMminsFD6               | 19 | 51.50   | 147.50  | 88.4211  | 20.84817       |
| WakeminsFD6              | 19 | 4.50    | 102.50  | 30.8158  | 31.11592       |
| numawakFD6               | 19 | 4.00    | 20.00   | 10.8947  | 5.11962        |
| WASOFD6                  | 19 | 2.50    | 99.50   | 19.0526  | 28.62395       |
| SWSFD6                   | 19 | 38.00   | 117.50  | 79.0526  | 18.64276       |
| Valid N (listwise)       | 19 |         |         |          |                |

**Table 1.7. Descriptive Statistics for FD7**

## Descriptive Statistics

|                          | N  | Minimum | Maximum | Mean     | Std. Deviation |
|--------------------------|----|---------|---------|----------|----------------|
| SleepEfficiencyFD7       | 19 | 73.28   | 97.38   | 90.2305  | 5.09122        |
| S.O.minsFD7              | 19 | 4.50    | 78.50   | 26.7632  | 17.55655       |
| TotalSleepTimeTSTminsFD7 | 19 | 293.50  | 389.50  | 360.1842 | 19.98903       |
| stage1minsFD7            | 19 | 9.00    | 48.00   | 29.8684  | 13.03504       |
| Stage2minsFD7            | 19 | 140.50  | 216.50  | 186.0526 | 22.07556       |
| Stage3minsFD7            | 19 | 8.50    | 50.50   | 25.8158  | 10.69555       |
| Stage4minsFD7            | 19 | 17.50   | 77.50   | 48.8947  | 19.20979       |
| REMminsFD7               | 19 | 42.00   | 103.50  | 70.3947  | 19.02745       |
| WakeminsFD7              | 19 | 10.00   | 107.00  | 37.9211  | 20.81617       |
| numawakFD7               | 19 | 4.00    | 27.00   | 12.3684  | 6.99373        |
| WASOFD7                  | 19 | 4.00    | 38.00   | 12.0000  | 9.01080        |
| SWSFD7                   | 19 | 47.50   | 102.50  | 74.7105  | 14.39456       |
| Valid N (listwise)       | 19 |         |         |          |                |

**Table 1.8. Descriptive Statistics for FD8**

## Descriptive Statistics

|                          | N  | Minimum | Maximum | Mean     | Std. Deviation |
|--------------------------|----|---------|---------|----------|----------------|
| SleepEfficiencyFD8       | 18 | 43.80   | 96.13   | 77.3572  | 14.98704       |
| S.O.minsFD8              | 18 | 4.00    | 78.50   | 20.0556  | 21.19093       |
| TotalSleepTimeTSTminsFD8 | 18 | 175.00  | 384.50  | 309.0278 | 60.45768       |
| stage1minsFD8            | 18 | 17.50   | 46.00   | 29.5000  | 8.39292        |
| Stage2minsFD8            | 18 | 77.00   | 221.00  | 157.1667 | 43.65170       |
| Stage3minsFD8            | 18 | 9.50    | 35.50   | 20.6111  | 6.65219        |
| Stage4minsFD8            | 18 | 21.50   | 72.00   | 42.6944  | 14.44171       |
| REMminsFD8               | 18 | 19.50   | 123.00  | 59.4722  | 24.02234       |
| WakeminsFD8              | 18 | 15.50   | 224.50  | 90.1111  | 59.82046       |
| numawakFD8               | 18 | 4.00    | 27.00   | 14.2778  | 7.01935        |
| WASOFD8                  | 18 | 2.50    | 188.50  | 70.4722  | 61.58960       |
| SWSFD8                   | 18 | 37.00   | 99.00   | 63.3056  | 15.93935       |
| Valid N (listwise)       | 18 |         |         |          |                |

**Table 1.9. Descriptive Statistics for FD9**

## Descriptive Statistics

|                          | N  | Minimum | Maximum | Mean     | Std. Deviation |
|--------------------------|----|---------|---------|----------|----------------|
| SleepEfficiencyFD9       | 19 | 30.63   | 96.75   | 75.2100  | 20.48256       |
| S.O.minsFD9              | 19 | .50     | 31.00   | 6.4737   | 6.87482        |
| TotalSleepTimeTSTminsFD9 | 19 | 121.00  | 387.50  | 300.8158 | 82.13154       |
| stage1minsFD9            | 19 | 11.50   | 57.50   | 31.7368  | 14.90001       |
| Stage2minsFD9            | 19 | 28.00   | 201.00  | 134.7895 | 47.71132       |
| Stage3minsFD9            | 19 | 4.50    | 36.00   | 17.2105  | 7.39428        |
| Stage4minsFD9            | 19 | 22.50   | 86.50   | 52.5263  | 19.25233       |
| REMminsFD9               | 19 | 6.00    | 116.00  | 64.7895  | 27.81852       |
| WakeminsFD9              | 19 | 12.50   | 277.50  | 98.6053  | 82.24465       |
| numawakFD9               | 19 | 5.00    | 25.00   | 14.8421  | 5.52030        |
| WASOFD9                  | 19 | 10.00   | 267.00  | 92.3684  | 79.43985       |
| SWSFD9                   | 19 | 34.00   | 104.00  | 69.7368  | 20.48602       |
| Valid N (listwise)       | 19 |         |         |          |                |

**Table 1.10. Descriptive Statistics for FD10**

## Descriptive Statistics

|                          | N  | Minimum | Maximum | Mean     | Std. Deviation |
|--------------------------|----|---------|---------|----------|----------------|
| SleepEfficiencyFD10      | 19 | 60.05   | 97.75   | 83.9742  | 12.47988       |
| S.O.minsFD10             | 19 | .00     | 16.00   | 2.8947   | 3.69902        |
| TotalSleepTimeTSTminsFD1 | 19 | 240.50  | 391.00  | 335.4737 | 50.09587       |
| stage1minsFD10           | 19 | 13.00   | 101.50  | 34.7895  | 20.98698       |
| Stage2minsFD10           | 19 | 90.00   | 200.00  | 138.5263 | 34.01530       |
| Stage3minsFD10           | 19 | 5.00    | 34.50   | 19.0000  | 7.68838        |
| Stage4minsFD10           | 19 | 35.00   | 105.00  | 62.4474  | 19.02695       |
| REMminsFD10              | 19 | 50.50   | 116.00  | 80.8684  | 23.40990       |
| WakeminsFD10             | 19 | 6.00    | 160.00  | 62.9474  | 50.14144       |
| numawakFD10              | 19 | 2.00    | 35.00   | 15.2105  | 7.55409        |
| WASOFD10                 | 19 | 1.00    | 155.00  | 60.2105  | 49.47595       |
| SWSFD10                  | 19 | 50.50   | 121.00  | 81.4474  | 19.35910       |
| Valid N (listwise)       | 19 |         |         |          |                |

**Table 1.11. Descriptive Statistics for FD11**

## Descriptive Statistics

|                           | N  | Minimum | Maximum | Mean     | Std. Deviation |
|---------------------------|----|---------|---------|----------|----------------|
| SleepEfficiencyFD11       | 20 | 59.50   | 99.38   | 88.3615  | 10.24612       |
| S.O.minsFD11              | 20 | .00     | 10.00   | 3.2500   | 2.67788        |
| TotalSleepTimeTSTminsFD11 | 20 | 238.00  | 397.50  | 353.3000 | 40.94264       |
| stage1minsFD11            | 20 | 10.50   | 82.50   | 35.0500  | 16.99837       |
| Stage2minsFD11            | 20 | 86.00   | 222.50  | 149.2500 | 34.07055       |
| Stage3minsFD11            | 20 | 6.50    | 43.50   | 24.9250  | 10.51224       |
| Stage4minsFD11            | 20 | 26.00   | 89.00   | 52.8750  | 16.83970       |
| REMminsFD11               | 20 | 50.50   | 137.50  | 91.4250  | 24.12973       |
| WakeminsFD11              | 20 | 2.50    | 162.00  | 45.1750  | 41.77864       |
| numawakFD11               | 20 | 2.00    | 47.00   | 15.2000  | 10.90919       |
| WASOFD11                  | 20 | 1.50    | 161.00  | 42.1500  | 42.03761       |
| SWSFD11                   | 20 | 43.00   | 112.50  | 77.8000  | 16.68627       |
| Valid N (listwise)        | 20 |         |         |          |                |

**Table 1.12. Descriptive Statistics for FD12**

## Descriptive Statistics

|                           | N  | Minimum | Maximum | Mean     | Std. Deviation |
|---------------------------|----|---------|---------|----------|----------------|
| SleepEfficiencyFD12       | 19 | 35.79   | 98.88   | 87.5084  | 15.20414       |
| S.O.minsFD12              | 19 | .50     | 158.50  | 23.8947  | 38.73076       |
| TotalSleepTimeTSTminsFD12 | 19 | 141.00  | 396.50  | 349.4211 | 62.22903       |
| stage1minsFD12            | 19 | 9.00    | 62.00   | 29.9737  | 12.24458       |
| Stage2minsFD12            | 19 | 49.00   | 226.00  | 166.7105 | 45.03064       |
| Stage3minsFD12            | 19 | 11.00   | 34.00   | 20.2105  | 6.95085        |
| Stage4minsFD12            | 19 | 13.50   | 85.00   | 51.1842  | 19.38729       |
| REMminsFD12               | 19 | 37.50   | 141.00  | 82.1316  | 25.75895       |
| WakeminsFD12              | 19 | 3.00    | 256.00  | 49.3684  | 60.58439       |
| numawakFD12               | 19 | 1.00    | 36.00   | 13.4737  | 9.60537        |
| WASOFD12                  | 19 | .50     | 182.00  | 26.2632  | 41.38450       |
| SWSFD12                   | 19 | 24.50   | 104.00  | 71.3947  | 19.31147       |
| Valid N (listwise)        | 19 |         |         |          |                |
